1 **Chronic neuronal excitation leads to homeostatic suppression**  
2 **of structural long-term potentiation**

3

4 Hiromi H. Ueda<sup>1,2</sup>, Aiko Sato<sup>1</sup>, Maki Onda<sup>1</sup>, and Hideji Murakoshi<sup>1, 2, 3 \*</sup>

5

6 <sup>1</sup>Supportive Center for Brain Research, National Institute for Physiological Sciences,  
7 Okazaki, Aichi 444-8585, Japan

8 <sup>2</sup>Department of Physiological Sciences, SOKENDAI (The Graduate University for  
9 Advanced Studies), Okazaki, Aichi 444-8585, Japan

10 <sup>3</sup>Lead Contact

11

12 \*Correspondence: murakosh@nips.ac.jp

13

14

## 15 **SUMMARY**

16 Synaptic plasticity is long-lasting changes in synaptic currents and structure. When neurons  
17 are exposed to signals that induce aberrant neuronal excitation, they increase the threshold  
18 for the induction of synaptic plasticity, called homeostatic plasticity. To further understand  
19 the homeostatic regulation of synaptic plasticity and its molecular mechanisms, we  
20 investigated glutamate uncaging/photoactivatable (pa)CaMKII-dependent sLTP induction  
21 in hippocampal CA1 neurons after chronic neuronal excitation by GABA<sub>A</sub> receptor  
22 antagonists. The neuronal excitation suppressed the glutamate uncaging-evoked Ca<sup>2+</sup> influx  
23 and failed to induce sLTP. Single-spine optogenetic stimulation using paCaMKII also failed  
24 to induce sLTP, suggesting that CaMKII downstream signaling is impaired in response to  
25 chronic neuronal excitation. Furthermore, while the inhibition of Ca<sup>2+</sup> influx was protein  
26 synthesis-independent, paCaMKII-induced sLTP depended on it. Our findings demonstrate  
27 that chronic neuronal excitation suppresses sLTP in two independent ways (i.e., the  
28 inhibitions of Ca<sup>2+</sup> influx and CaMKII downstream signaling), which may contribute to the  
29 robust neuronal protection in excitable environments.

## 31 **KEYWORDS**

32 CaMKII, homeostatic plasticity, optogenetics, structural synaptic plasticity, two-photon  
33 microscopy.

## 35 **INTRODUCTION**

36 Long-term potentiation (LTP), a form of synaptic plasticity, is a persistent increase  
37 in synaptic strength. The molecular mechanism of LTP has been well-studied in the  
38 excitatory synapse of the hippocampus (Nicoll, 2017; Yashiro and Philpot, 2008).  
39 Presynaptic glutamate binds to postsynaptic N-methyl-D-aspartate (NMDA)-type  
40 glutamate receptors (NMDARs). It induces Ca<sup>2+</sup> influx into the dendritic spines through  
41 NMDARs (Yashiro and Philpot, 2008). The increase in Ca<sup>2+</sup> activates various intracellular  
42 signaling molecules such as calmodulin (Bayer and Schulman, 2019; Lisman et al., 2012).  
43 The activated calmodulin (Ca<sup>2+</sup>/calmodulin) binds to Ca<sup>2+</sup>/calmodulin-dependent protein  
44 kinase II (CaMKII) (Bayer and Schulman, 2019; Giese and Mizuno, 2013; Herring and  
45 Nicoll, 2016; Lisman et al., 2012). It results in the increased kinase activity by the changes  
46 of CaMKII structure (Lee et al., 2009; Saneyoshi et al., 2019). The activated CaMKII

47 phosphorylates and recruits signaling molecules (Bosch et al., 2014; Murakoshi and  
48 Yasuda, 2012; Nakahata and Yasuda, 2018). These events lead to spine enlargement and  
49  $\alpha$ -amino-3-hydroxy-5-methyl-4-isoxazole propionic acid (AMPA)-type glutamate  
50 receptors (AMPA receptors) accumulation in the postsynaptic density (i.e., LTP) (Cingolani and  
51 Goda, 2008; Derkach et al., 2007; Malinow and Malenka, 2002). Notably, previous reports  
52 have indicated that CaMKII activation is sufficient to trigger LTP (Jourdain et al., 2003;  
53 Lledo et al., 1995; Pettit et al., 1994; Shibata et al., 2021). Since previous reports suggest  
54 that persistent spine enlargement correlates well with the increase in AMPA currents (i.e.,  
55 LTP) (Govindarajan et al., 2011; Harvey and Svoboda, 2007; Matsuzaki et al., 2004), this  
56 spine enlargement has been termed as structural LTP (sLTP).

57 The threshold for LTP induction is regulated to maintain optimal neuronal  
58 excitability, which is called homeostatic plasticity. More specifically, it is called the  
59 sliding threshold, meta-plasticity, or Bienenstock, Cooper, and Munro (BCM) theory  
60 (Cooper and Bear, 2012; Keck et al., 2017). In this model, the threshold for LTP induction  
61 could increase in response to prolonged neuronal excitation. This suppression of LTP  
62 prevents the positive feedback loop of LTP in excitable environments, which contributes  
63 to the stabilization of neuronal excitability. For example, after the chronic application of  $\gamma$ -  
64 Aminobutyric acid type A (GABA<sub>A</sub>) receptor antagonists in cultured hippocampal slices,  
65 high-frequency electrical stimulation of Schaffer collaterals fails to induce LTP (Abegg et  
66 al., 2004; Moulin et al., 2019; Suarez et al., 2012). The electrical induction of LTP is also  
67 impaired in acute slices after chronic optogenetic excitation administered to the ventral  
68 hippocampus of freely moving mice (Moulin et al., 2019). From a physiological point of  
69 view, epileptic seizures reduce the LTP accompanying spatial memory deficits (Suarez et  
70 al., 2012). These findings demonstrate the functional depression of synaptic plasticity in  
71 response to aberrant neuronal excitation. However, whether structural synaptic plasticity is  
72 also depressed in excited neurons remains elusive. Furthermore, molecular mechanisms of  
73 the homeostatic regulation of synaptic plasticity are poorly understood.

74 To investigate the occurrence of sLTP, we used two-photon glutamate uncaging  
75 (Matsuzaki et al., 2004) and photoactivatable (pa)CaMKII (Shibata et al., 2021) after  
76 chronic neuronal excitation in cultured hippocampal slices. We found that chronic  
77 neuronal excitation led to the suppression of glutamate uncaging-evoked Ca<sup>2+</sup> influx into  
78 dendritic spines in a protein synthesis-independent manner and failure of sLTP induction.  
79 Additionally, the photoactivation of paCaMKII in single spines using two-photon

80 excitation also failed to induce sLTP, but reversed in the presence of protein synthesis  
81 inhibitor, suggesting that the chronic excitation impairs CaMKII downstream signaling in  
82 a protein synthesis-dependent manner. These results demonstrate that two independent  
83 mechanisms (i.e., the inhibitions of Ca<sup>2+</sup> influx and CaMKII downstream activity) are  
84 responsible for robust sLTP suppression after chronic neuronal excitation.

85

## 86 **RESULTS**

### 87 **Chronic bicuculline application induces neuronal activation and homeostatic** 88 **depression of spine density**

89 To induce prolonged neuronal excitation, we applied the GABA<sub>A</sub> receptor antagonist  
90 bicuculline (10 μM) to cultured hippocampal slices for 24 hours (Figure 1A). To label the  
91 chronically excited neurons, we employed the synthetic activity-dependent promoter,  
92 ESARE (Kawashima et al., 2013), in combination with a fast-maturation mutant of yellow  
93 fluorescent proteins, Achilles (Yoshioka-Kobayashi et al., 2020) with a destabilization  
94 signal (Li et al., 1998), called d2Achilles. We transfected CA1 pyramidal neurons in  
95 cultured hippocampal slices by injecting adeno-associated viral vectors (AAVs) encoding  
96 ESARE-d2Achilles (Figure 1B). After 5–8 days, we incubated the slices in bicuculline-  
97 containing culture media for 24 hours, and successfully observed d2Achilles fluorescence  
98 (i.e., chronically excited neurons) (Figure 1C). For the control experiment (no treatment  
99 with bicuculline), we injected AAVs-Syn-DIO-Achilles with a low concentration of  
100 AAVs-CaMP0.4-Cre to sparsely label the neurons (Figure 1B). Previous studies reported  
101 the depression of spine density as a form of homeostatic plasticity in response to neuronal  
102 excitation (Fiore et al., 2014; Goold and Nicoll, 2010; Mendez et al., 2018; Moulin et al.,  
103 2019). Consistent with this, the spine density of our chronically excited neurons was  
104 significantly decreased relative to that of the control neurons (Figures 1D and 1E),  
105 indicating that the chronic bicuculline application induces the homeostatic depression of  
106 spine density in hippocampal neurons.

107

### 108 **Glutamate uncaging fails to induce sLTP in chronically excited neurons**

109 To investigate the structural plasticity of dendritic spines in chronically excited neurons,  
110 we applied a low-frequency train of two-photon glutamate uncaging at a spine and  
111 monitored Achilles fluorescence of the spine by two-photon excitation at 920 nm (Figures

112 **2A and 2B**). In the control experiments, the volume of the stimulated spines, but not  
113 adjacent spines, rapidly increased (317%, 4–6 min: transient phase) and relaxed to an  
114 elevated volume for 20–30 min (133%, 20–30 min: sustained phase) (**Figures 2C and 2D**).  
115 Contrastingly, the enlargement of the stimulated spines did not occur in chronically  
116 excited neurons (**Figures 2A–2D**). After chronic neuronal excitation by another GABA<sub>A</sub>  
117 receptor antagonist, gabazine, glutamate uncaging also failed to induce sLTP (**Figures 2E–**  
118 **2H**). These results demonstrate that chronic neuronal excitation leads to the depression of  
119 sLTP in hippocampal CA1 neurons.

120

### 121 **The inhibition of protein synthesis partially recovers sLTP**

122 Prolonged neuronal excitation induces protein synthesis and degradation (**Dorrbaum et al.,**  
123 **2020; Schanzenbacher et al., 2018; Schanzenbacher et al., 2016**). It has been reported that  
124 protein synthesis is required for homeostatic depression of spine density (**Mendez et al.,**  
125 **2018**). Thus, we expected that sLTP suppression would depend on protein synthesis. To  
126 test this, we applied the protein synthesis inhibitor anisomycin (100 μM) along with  
127 bicuculline to hippocampal slices for 24 hours (**Figure 3A**). Since anisomycin inhibits  
128 activity-dependent d2Achilles protein synthesis, we injected the AAVs-CaMP0.4-DIO-  
129 Achilles with a low concentration of AAVs-Syn-Cre, instead of AAVs-ESARE-  
130 d2Achilles (**Figure 3B**). We confirmed that glutamate uncaging-induced sLTP was also  
131 impaired in Achilles-expressing neurons after the bicuculline treatment (**Figures 3C–3F**).  
132 Furthermore, the application of anisomycin partially recovered sLTP (**Figures 3C–3F**).  
133 These results demonstrate that the suppression of sLTP is partially dependent on protein  
134 synthesis.

135

### 136 **Glutamate uncaging-induced Ca<sup>2+</sup> influx into single spines decreases after chronic** 137 **neuronal excitation**

138 Chronic neuronal excitation has been shown to induce the depression of NMDAR currents  
139 (**Goold and Nicoll, 2010; Watt et al., 2000**). Therefore, it is possible that the chronic  
140 excitation may depress NMDAR-dependent Ca<sup>2+</sup> influx, resulting in the suppression of  
141 sLTP. To measure the Ca<sup>2+</sup> influx, we transfected CMV-GCaMP6f-P2A-mScarlet into  
142 CA1 pyramidal neurons using a gene gun and monitored the GCaMP6f transient in a spine  
143 after a single pulse of glutamate uncaging (720 nm, 6 ms duration/pulse, 6 mW) in the  
144 presence and absence of bicuculline and anisomycin (**Figures 4A–4C**) (**Chen et al., 2013**).

145 We found that uncaging-evoked  $\text{Ca}^{2+}$  transients decreased in the neurons treated with  
146 bicuculline (Figure 4C). Quantitative analysis revealed that the peak amplitude of the  $\text{Ca}^{2+}$   
147 transients was significantly lower in the bicuculline treatment than that of the  $\text{Ca}^{2+}$   
148 transients in the control neurons (Figures 4D and 4E). The application of anisomycin with  
149 bicuculline did not reverse the suppression of the  $\text{Ca}^{2+}$  transients (Figures 4C–4E),  
150 suggesting that the suppression of the  $\text{Ca}^{2+}$  influx is not dependent on protein synthesis.  
151 This result is consistent with the findings from a previous study wherein NMDAR currents  
152 were depressed via a protein synthesis-independent pathway after chronic neuronal  
153 excitation (Goold and Nicoll, 2010). Conversely, sLTP suppression was partially  
154 dependent on protein synthesis (Figure 3). Thus, our findings suggest that other  
155 mechanisms may be involved in sLTP depression besides the suppression of  $\text{Ca}^{2+}$   
156 transients.

157

#### 158 **paCaMKII activation fails to induce sLTP in chronically excited neurons**

159 Next, we investigated the downstream of  $\text{Ca}^{2+}$  in the signal cascade for sLTP. It has been  
160 shown that the activation of CaMKII downstream signaling is necessary to induce sLTP in  
161 hippocampal neurons (Bayer and Schulman, 2019; Giese and Mizuno, 2013; Herring and  
162 Nicoll, 2016; Lisman et al., 2012). Thus, it is possible that the impairment of CaMKII  
163 downstream signaling causes the suppression of sLTP. To examine this hypothesis, we  
164 directly activated CaMKII downstream signaling by using the genetically encoded  
165 paCaMKII (Figure 5A) (Shibata et al., 2021). Two-photon excitation of paCaMKII  
166 enables the activation of CaMKII downstream molecules in single spines and induces  
167 sLTP without  $\text{Ca}^{2+}$  influx (Shibata et al., 2021). We co-transfected hippocampal neurons  
168 by injecting AAVs encoding tdTomato-P2A-paCaMKII with ESARE-d2Achilles or AAVs  
169 in control experiments (Figure 5B). First, we identified the neurons expressing paCaMKII  
170 by observing tdTomato fluorescence using epifluorescence microscopy. Subsequently, we  
171 monitored the neurons by observing d2Achilles/Achilles fluorescence using two-photon  
172 microscopy at an excitation wavelength of 1010 nm (Figure 5C). To induce paCaMKII  
173 activation in single spines, we applied a low-frequency train of two-photon excitation  
174 pulses to single spines (820 nm, 30 pulses, 0.5 Hz, 80 ms duration/pulse, 4 mW) (Figure  
175 5B). In the control experiments, the spine volume increased rapidly by approximately  
176 301% following paCaMKII activation (4–6 min) and relaxed to an elevated level of 91%  
177 during 20–30 min (Figures 5D–5F). By contrast, chronically excited neurons did not show

178 spine enlargement (Figures 5D–5F), similar to the results of glutamate uncaging (Figures  
179 2A–2D). These results indicate that paCaMKII-induced sLTP was suppressed in  
180 chronically excited neurons. A possible explanation for this suppression is the difference  
181 in the expression/activity of paCaMKII between the chronically excited and control  
182 neurons; to investigate this, we examined the expression level and activity of paCaMKII  
183 using a biochemical assay. We transfected the dissociated hippocampal neurons with  
184 CaMK0.4-paCaMKII and ESARE-mScarlet using AAVs (Figure 5G), and confirmed  
185 neuronal activation after the treatment with bicuculline (10  $\mu$ M) by monitoring the robust  
186 expression of mScarlet (Figure 5H). We evaluated the expression and pT286  
187 autophosphorylation of paCaMKII under blue light illumination. Chronic neuronal  
188 excitation did not change the expression or light-induced activation of paCaMKII (Figure  
189 5H). Thus, paCaMKII-induced sLTP may be suppressed due to the inhibition of CaMKII  
190 downstream rather than paCaMKII itself.

191

### 192 **The activity of the CaMKII pathway is not saturated in chronically excited neurons**

193 The application of bicuculline induces an increase in the intracellular  $\text{Ca}^{2+}$  concentration in  
194 cultured hippocampal slices (van der Linden et al., 1993). Since  $\text{Ca}^{2+}$  activates CaMKII  
195 pathways in dendritic spines, the long-lasting  $\text{Ca}^{2+}$  increase induced by the chronic  
196 application of bicuculline may saturate the activity of CaMKII downstream. To examine  
197 whether the CaMKII downstream activity is saturated, we augmented paCaMKII  
198 activation by increasing the duration per pulse of the two-photon excitation with a fixed  
199 pulse number. In the neurons with no bicuculline treatment, extended activation (320  
200 ms/pulse) induced a large spine enlargement compared to that observed in the control  
201 stimulation (80 ms/pulse) (Figure 6). This is most likely due to the increase in the activity  
202 of CaMKII downstream signaling. In chronically excited neurons, prolonged activation of  
203 paCaMKII (320 ms/pulse) successfully induced sLTP (Figure 6), indicating that CaMKII  
204 downstream molecules were activated in chronically excited neurons. These results  
205 suggest that chronic neuronal excitation makes the activity of CaMKII downstream  
206 suppressed rather than saturated.

207

### 208 **The suppression of paCaMKII-induced sLTP is dependent on protein synthesis**

209 Finally, we examined whether the suppression of paCaMKII-induced sLTP requires the  
210 newly synthesized proteins during chronic neuronal activation. We transfected AAVs-

211 tdTomato-P2A-paCaMKII and AAVs-CaMP0.4-DIO-Achilles with a low amount of  
212 AAVs-CaMP0.4-Cre for sparse labeling. We confirmed that paCaMKII-induced sLTP was  
213 also impaired in Achilles-expressing neurons after the bicuculline treatment (Figure 7).  
214 Notably, the inhibition of sLTP was reversed by the inhibition of protein synthesis (Figure  
215 7). These results suggest that sLTP inhibition may be caused by the downstream inhibition  
216 of CaMKII by newly synthesized proteins.  
217  
218



## 219 **DISCUSSION**

220 In this study, we demonstrated that sLTP induction is suppressed by chronic neuronal  
221 excitation in hippocampal neurons, most likely via the inhibition of Ca<sup>2+</sup> influx into  
222 dendritic spines and the inhibition of CaMKII downstream pathways. While the  
223 downstream inhibition of CaMKII is dependent on protein synthesis, the inhibition of Ca<sup>2+</sup>  
224 influx is protein synthesis-independent. Thus, this two-step inhibitory mechanism may  
225 contribute to the robust inhibition of sLTP to stabilize the synaptic structure and  
226 excitability.

227 We found that glutamate uncaging-induced Ca<sup>2+</sup> influx was suppressed after  
228 chronic neuronal excitation. It has been shown that the Ca<sup>2+</sup> permeability of dendritic  
229 spines depends on the subunit composition of postsynaptic NMDARs (Lee et al., 2010;  
230 Sobczyk et al., 2005). Glutamate uncaging-induced Ca<sup>2+</sup> influx through NR2B subunit-  
231 containing NMDARs is higher than that through NR2A subunit-containing NMDARs  
232 (Sobczyk et al., 2005). Some studies have shown that the expression of NR2B-containing  
233 NMDARs decreases after chronic neuronal excitation (Ehlers, 2003; Perez-Otano and  
234 Ehlers, 2005; Schanzenbacher et al., 2016). Thus, the decrease in Ca<sup>2+</sup> influx may be  
235 caused by the downregulation of NR2B-containing NMDARs in dendritic spines.  
236 Accompanied by the suppression of Ca<sup>2+</sup> influx, glutamate uncaging-induced sLTP was  
237 suppressed after the chronic neuronal excitation. Previous studies have proposed that the  
238 threshold of LTP is adjusted in response to neuronal excitation, a phenomenon termed as  
239 the sliding threshold model (Cooper and Bear, 2012; Keck et al., 2017). It is well  
240 established that the composition of postsynaptic NMDARs is a key determinant of the  
241 threshold for LTP, because the Ca<sup>2+</sup> influx through the receptors triggers LTP. (Cooper  
242 and Bear, 2012; Keck et al., 2017; Lee et al., 2010). The suppression of Ca<sup>2+</sup> influx and  
243 sLTP in our results supports the NMDAR-dependent mechanism of the sliding threshold  
244 model.

245 While the change in NMDAR composition is a well-established molecular  
246 mechanism of the sliding threshold model, other additional mechanisms remain  
247 unexplored. Here, we induced sLTP by the direct activation of CaMKII signaling using  
248 paCaMKII. It has been shown that the activation of paCaMKII induces LTP without Ca<sup>2+</sup>  
249 influx (Shibata et al., 2021). We found that paCaMKII-induced sLTP was suppressed by  
250 chronic neuronal excitation. Since the expression and function of paCaMKII did not

251 change after the chronic excitation, the downstream activity of CaMKII could have been  
252 impaired. The augmentation of paCaMKII activation successfully induced sLTP even in  
253 chronically excited neurons, implying that the chronic excitation increases the threshold  
254 for activation of CaMKII downstream signaling. These results demonstrate that there must  
255 be an NMDAR-Ca<sup>2+</sup>-independent mechanism that explains the increased threshold for  
256 sLTP.

257 We also found that the impairment of sLTP, especially paCaMKII-induced sLTP, is  
258 protein synthesis-dependent. This suggests that newly synthesized proteins during the  
259 neuronal excitation inhibit the CaMKII downstream signaling for sLTP. In fact, it has been  
260 shown that numerous proteins are expressed after the chronic application of bicuculline  
261 (Schanzenbacher et al., 2018; Schanzenbacher et al., 2016), and they are known to  
262 regulate the shape and size of dendritic spines. For example, since Homer1a, Plk2, and  
263 Nr4a1 are expressed by the chronic application of GABA<sub>A</sub> receptor antagonists and induce  
264 homeostatic depression of the spine density, these proteins could be candidate proteins for  
265 sLTP inhibition (Chen et al., 2014; Fiore et al., 2014; Hu et al., 2010; Lee et al., 2011;  
266 Sala et al., 2003; Seeburg and Sheng, 2008).

267 Based on our findings, we propose that the homeostatic depression of the CaMKII  
268 pathway coupled with a decrease in Ca<sup>2+</sup> influx is a mechanism for the sliding threshold  
269 model (Figure 8). To the best of our knowledge, this is the first report showing the  
270 NMDAR-independent mechanism of the sliding threshold model. These two mechanisms  
271 for sLTP suppression possibly complement each other to maintain reliable homeostatic  
272 plasticity and the stabilization of neuronal excitability.

273

274

## 275 **ACKNOWLEDGEMENTS**

276 This work was supported in part by a Grant-in-Aid for Scientific Research in Innovative  
277 Areas (18H02708, 18K19382, 18H04748 Resonance Bio, 19H05434 Singularity Biology,  
278 and 16K15225 and JP16H06280 Advanced Bioimaging Support (ABiS) to H.M.) from the  
279 MEXT/Japan Society for the Promotion of Sciences (JSPS), Core Research for  
280 Evolutional Science and Technology (CREST) (to H.M.) from the Japan Science and  
281 Technology Agency (JST), the Research Foundation for Opto-Science and Technology (to  
282 H.M.), the Japan Foundation for Applied Enzymology (to H.M.), the Takeda Science  
283 Foundation, the Asahi Glass Foundation (to H.M.), Frontier Photonic Sciences Project of  
284 National Institutes of Natural Sciences (NINS).

285

## 286 **AUTHOR CONTRIBUTIONS**

287 H.H.U. and H.M. conceived and designed the project. H.H.U. performed the experiments  
288 and analyzed the data. A.S., M.O., and H.M. contributed to the cell culture preparation,  
289 reagent preparation, and software analysis. H.H.U. and H.M. wrote the manuscript. All the  
290 coauthors discussed the results and exchanged comments on the manuscript.

291

## 292 **DECLARATION OF INTERESTS**

293 The authors declare no competing interests.

294

295

296 **FIGURES**

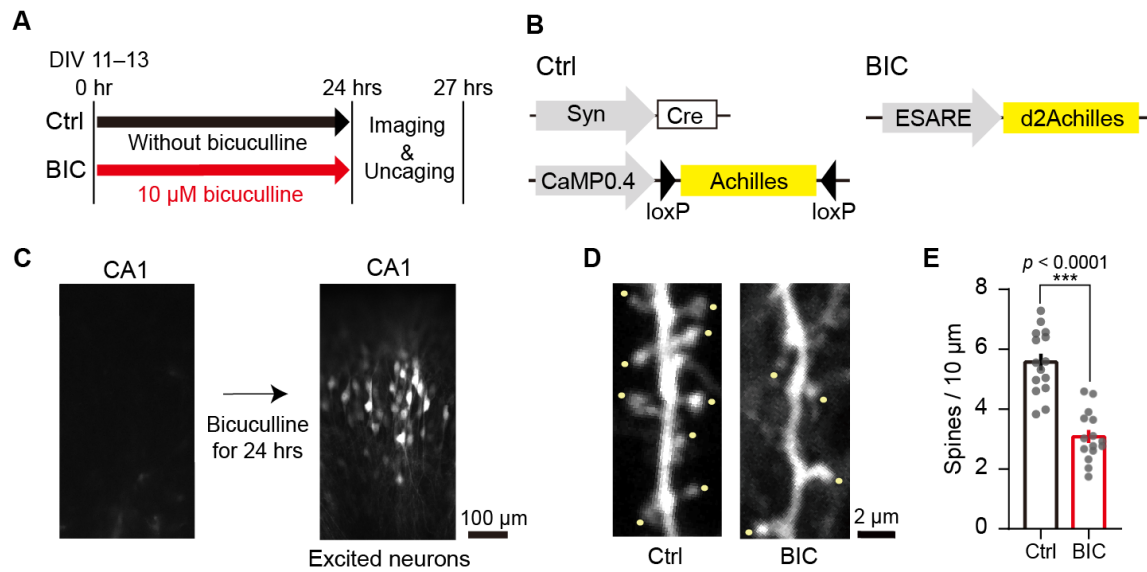

297

298 **Fig. 1. Chronic bicuculline application induces neuronal activation and homeostatic**  
299 **depression of spine density**

300 (A) Schematic timelines of the experimental protocol for two-photon imaging and  
301 glutamate uncaging. Hippocampal slices were incubated in a culture medium containing  
302 bicuculline (BIC) for 24 hrs to excite the neurons chronically. Subsequently, the slices  
303 were placed in an imaging buffer and the experiment was carried out for up to 3 hrs.

304 (B) In the control experiments (Ctrl), AAVs encoding Cre under synapsin promoter (Syn)  
305 and Achilles double-floxed inverse orientation (DIO) under a 0.4 kb version of CaMKII  
306 promoter (CaMP0.4) were used for sparse labeling. For the group treated with bicuculline  
307 (BIC), AAV encoding d2Achilles under the activity-dependent promoter ESARE was  
308 used.

309 (C) Epifluorescence images of hippocampal slices transfected with ESARE-d2Achilles.  
310 No d2Achilles expression was observed before the treatment with bicuculline. After the  
311 treatment, a number of CA1 pyramidal neurons expressed d2Achilles.

312 (D and E) Measurement of spine density in hippocampal CA1 neurons after the treatment  
313 with bicuculline. Yellow points indicate counted spines. The number of samples  
314 (dendrites/neurons) was 15/5 and 15/5 for Ctrl and BIC, respectively. The data are  
315 presented as mean  $\pm$  standard error of the mean. Statistical comparisons were performed  
316 using a two-tailed unpaired *t* test. \*\*\* $p < 0.001$ .

317

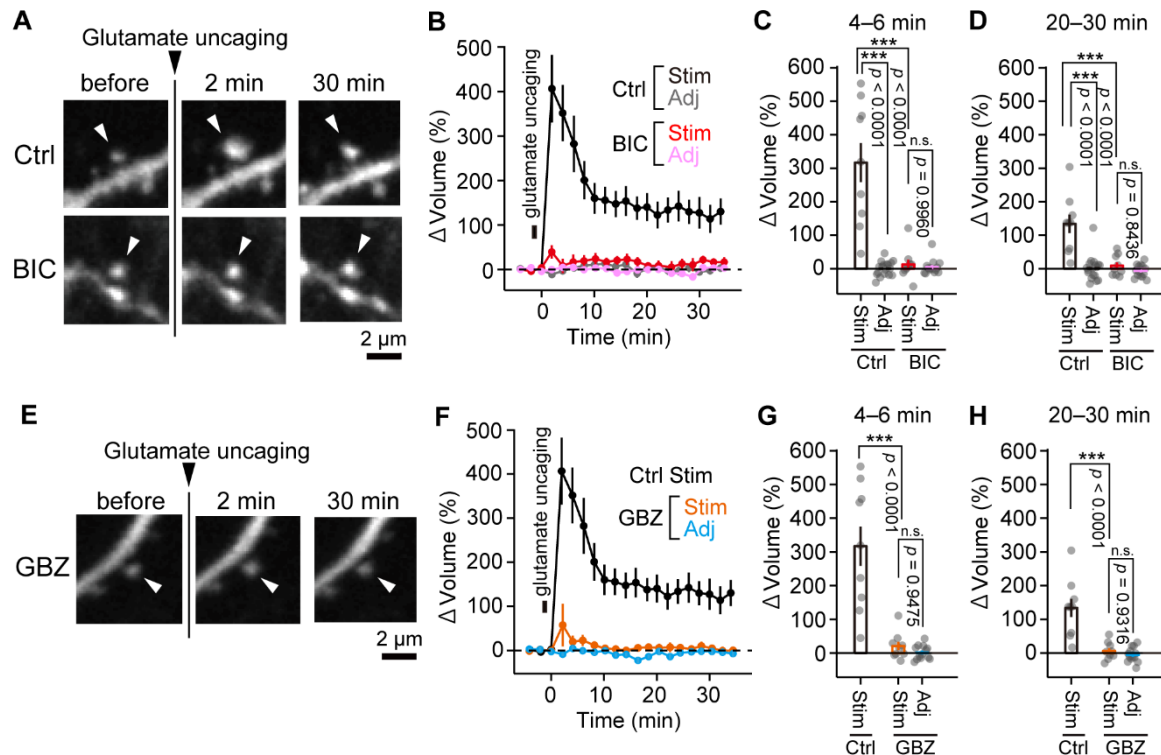

318 **Fig. 2. Glutamate uncaging fails to induce sLTP in chronically excited neurons**

319 (A and E) Two-photon fluorescence images of dendritic spines during the induction of  
 320 sLTP by two-photon glutamate uncaging. Hippocampal CA1 neurons expressing Achilles  
 321 or d2Achilles were observed by two-photon excitation at 920 nm, and MNI-glutamate was  
 322 uncaged at 720 nm (30 trains, 0.5 Hz, 6 ms duration/pulse, 6 mW) on a spine indicated by  
 323 white arrows.

324 (B) Averaged time course of the change in spine volume upon glutamate uncaging after  
 325 treatment with bicuculline in the stimulated (BIC-Stim) and adjacent spines (2–10 μm,  
 326 BIC-Adj). For comparison, the time course of the stimulated spines (Ctrl-Stim) and  
 327 adjacent spines (2–10 μm, Ctrl-Adj) that were not treated with bicuculline is also shown.  
 328 The number of samples (spines/neurons) was 9/6 for Ctrl-Stim, 18/9 for Ctrl-Adj, 9/5 for  
 329 BIC-Stim, and 14/5 for BIC-Adj.

330 (C and D) Quantification of the transient (C, averaged over 4–6 min) and sustained (D,  
 331 averaged over 20–30 min) change in spine volume. The data are presented as mean ±  
 332 standard error of the mean (SEM). Statistical comparisons were performed using one-way  
 333 analysis of variance followed by Turkey's test. \*\*\*\*p < 0.0001; n.s. represents p > 0.05.

334 (F) Averaged time course of the change in spine volume upon glutamate uncaging after  
 335 gabazine treatment in the stimulated (GBZ-Stim) and adjacent spines (2–10 μm, GBZ-  
 336 Adj). For comparison, the time course of the stimulated spines (Ctrl-Stim in Fig. 2B) with

337 no treatment is replotted. The number of samples (spines/neurons) was 10/4 for GBZ-  
338 Stim, and 13/4 for GBZ-Adj.  
339 (G and H) Quantification of the transient (G, averaged over 4–6 min) and sustained (H,  
340 averaged over 20–30 min) change in spine volume. The data are presented as mean  $\pm$   
341 SEM. Statistical comparisons were performed using one-way analysis of variance  
342 followed by Tukey's test. \*\*\* $p < 0.001$ ; n.s. represents  $p > 0.05$ .  
343  
344

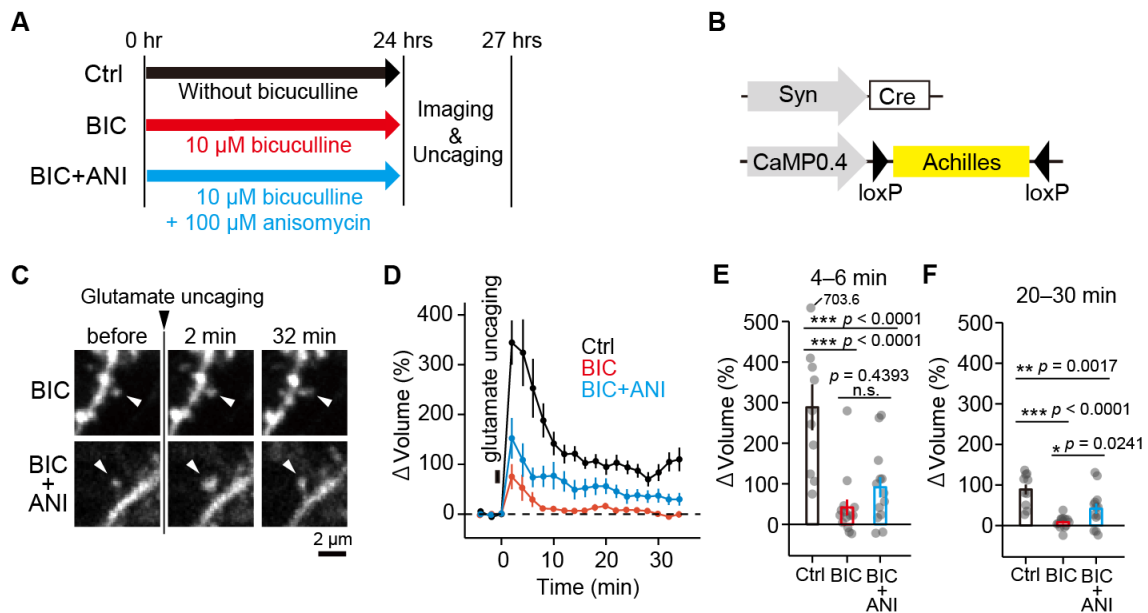

345

346 **Fig. 3. The inhibition of protein synthesis partially recovers sLTP**

347 (A) Schematic timelines of control (Ctrl), bicuculline treatment (BIC), and anisomycin  
 348 with bicuculline treatment (BIC+ANI).

349 (B) Schematic of AAV-Syn-Cre and AAV-CaMP0.4-DIO-Achilles used in the  
 350 experiments.

351 (C) Two-photon fluorescence images of dendritic spines during the induction of sLTP by  
 352 two-photon glutamate uncaging. A hippocampal CA1 neuron expressing Achilles was  
 353 observed by two-photon excitation at 920 nm, and caged glutamate was uncaged at 720  
 354 nm (30 trains, 0.5 Hz, 6 ms duration/pulse, 6 mW) on a spine indicated by white arrows.

355 (D) Averaged time course of the change in spine volume in stimulated spines in the  
 356 control condition, bicuculline treatment, and anisomycin with bicuculline treatment. The  
 357 number of samples (spines/neurons) was 10/7 for Ctrl, 14/7 for BIC, and 13/5 for  
 358 BIC+ANI.

359 (E and F) Quantification of the transient (E, averaged over 4–6 min) and sustained (F,  
 360 averaged over 20–30 min) change in spine volume. The data are presented as mean  $\pm$   
 361 standard error of the mean. Statistical comparisons were performed using one-way  
 362 analysis of variance followed by Tukey's test. \*\*\* $p < 0.001$ ; \*\* $p < 0.01$ ; \* $p < 0.05$ ; n.s.  
 363 represents  $p > 0.05$ .

364

365

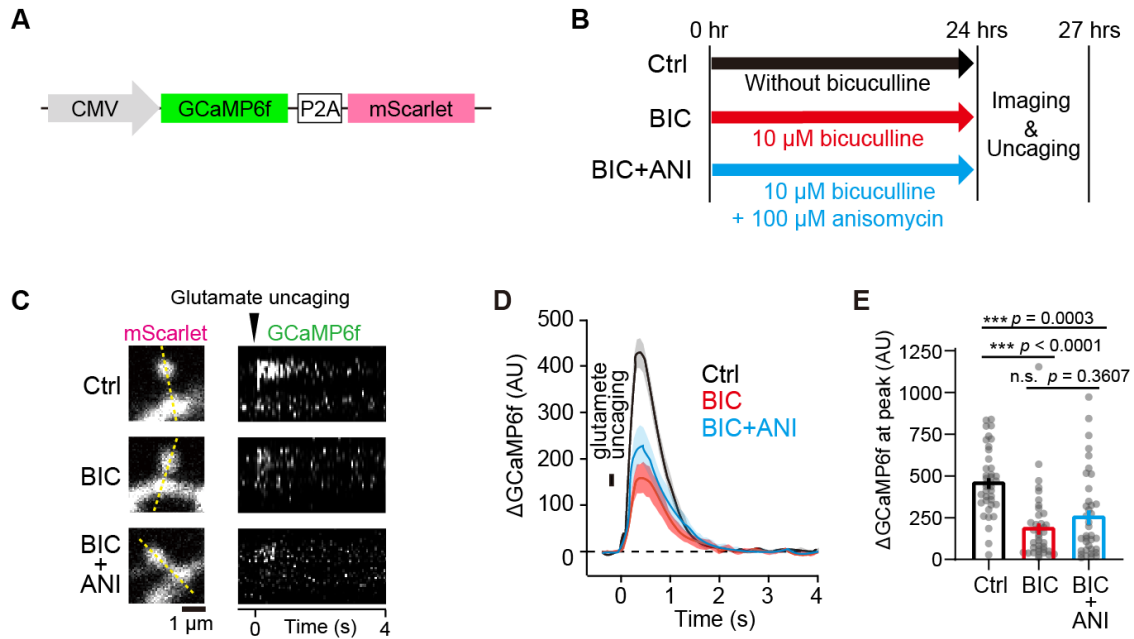

366

367 **Fig. 4. Glutamate uncaging-induced  $\text{Ca}^{2+}$  influx into single spines decreases after**  
368 **chronic neuronal excitation**

369 (A) Schematic of CMV-GCaMP6f-P2A-mScarlet transfected into hippocampal CA1  
370 neurons.

371 (B) Schematic timelines of control (Ctrl), bicuculline treatment (BIC), and anisomycin  
372 with bicuculline (BIC+ANI) treatment.

373 (C) Two-photon fluorescence images of the spines (mScarlet) before glutamate uncaging  
374 (left column) and GCaMP6f fluorescence of  $\text{Ca}^{2+}$  transients in the spines after uncaging  
375 (right column), which is shown as a kymograph of yellow dash lines. Both mScarlet and  
376 GCaMP6f were imaged by two-photon excitation at 1000 nm, and caged glutamate was  
377 uncaged at 720 nm (1 trains, 6 ms duration/pulse, 6 mW) at the tip of the spines.

378 (D) Averaged time course of  $\text{Ca}^{2+}$  change in the stimulated spines in control; 24 hrs  
379 bicuculline treatment; bicuculline and anisomycin treatment. The number of samples  
380 (spines/neurons) was 39/10 for Ctrl, 39/11 for BIC, and 37/9 for BIC+ANI.

381 (E) Quantification of peak changes of  $\text{Ca}^{2+}$  transients. The data are presented as mean  $\pm$   
382 standard error of the mean. Statistical comparisons were performed using one-way  
383 analysis of variance followed by Tukey's test. \*\*\* $p < 0.001$ ; n.s. represents  $p > 0.05$ .

384

385



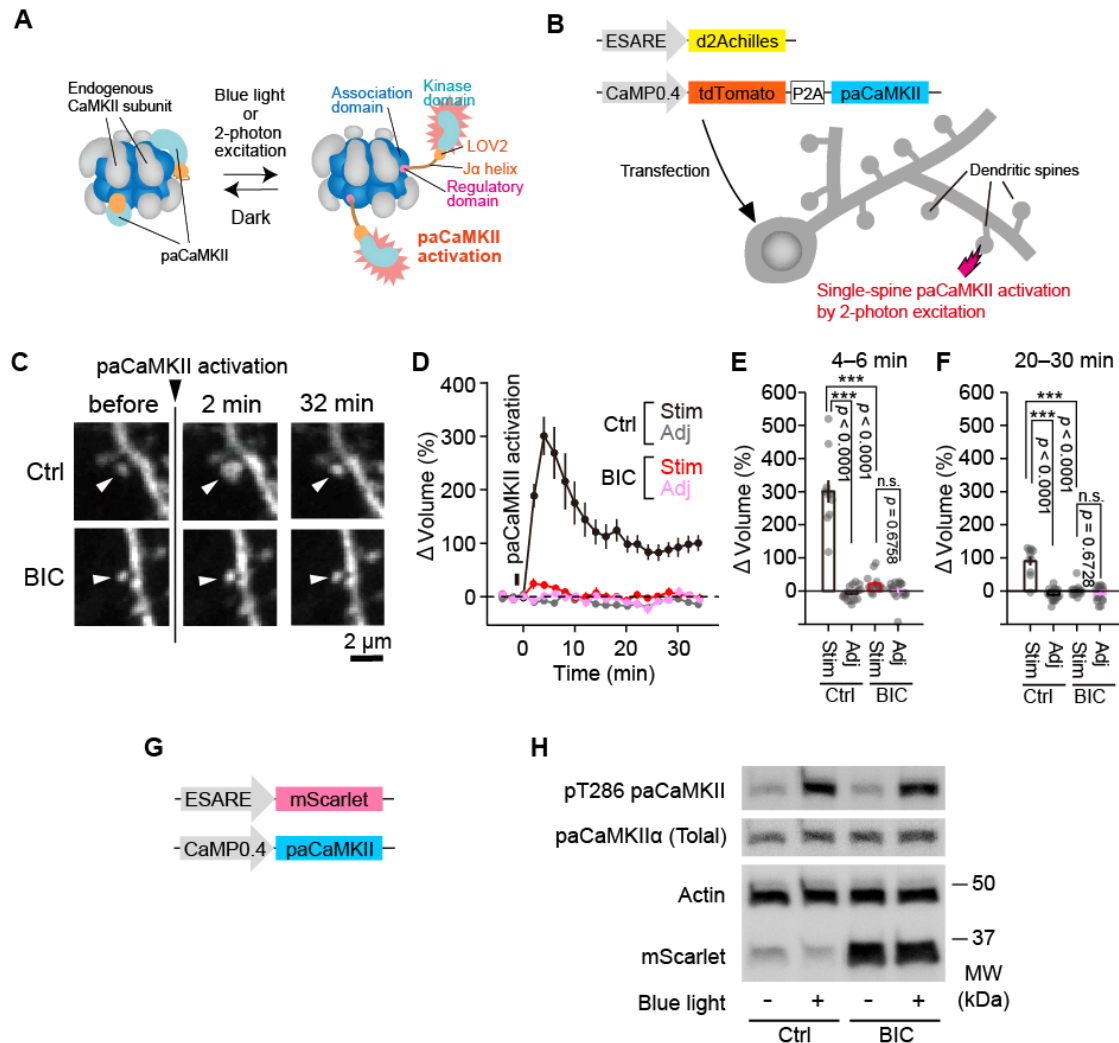

386

387 **Fig. 5. paCaMKII activation fails to induce sLTP in chronically excited neurons**

388 (A) Schematic drawing of paCaMKII activation in the oligomeric state. Two-photon  
389 excitation induces a structural change of paCaMKII, thereby activating it. Note that  
390 paCaMKII can be integrated into an endogenous CaMKII oligomer. The figure was  
391 adopted from a previous study (Shibata et al., 2021).

392 (B) Schematic representation of sLTP induction by paCaMKII activation. AAVs encoding  
393 CaMP0.4-tdTomato-P2A-paCaMKII and ESARE-d2Achilles were co-transfected into the  
394 neurons.

395 (C) Two-photon fluorescence images of dendritic spines during the induction of sLTP by  
396 two-photon paCaMKII activation. Hippocampal CA1 neurons expressing Achilles or  
397 d2Achilles and tdTomato-P2A-paCaMKII were observed by two-photon excitation at  
398 1010 nm, and paCaMKII was activated at 820 nm (30 trains, 0.5 Hz, 80 ms duration/pulse,  
399 4 mW) in the spine indicated by white arrows.

400 (D) Averaged time course of the change in spine volume in the stimulated spine (BIC-  
401 Stim) and adjacent spines (2–10  $\mu\text{m}$ , BIC-Adj) 24 hrs after bicuculline application. A  
402 control experiment (Ctrl-Stim) and adjacent spines (2–10  $\mu\text{m}$ , Ctrl-Adj) are also shown.  
403 The number of samples (spines/neurons) was 10/4 for Ctrl-Stim, 19/4 for Ctrl-Adj, 14/5  
404 for BIC-Stim, and 17/5 for BIC-Adj, respectively.

405 (E and F) Quantification of the transient (C, averaged over 4–6 min) and sustained (D,  
406 averaged over 20–30 min) change in spine volume. Data are presented as the mean  $\pm$   
407 standard error of the mean. Statistical comparisons were performed using one-way  
408 analysis of variance followed by Tukey's test. \*\*\* $p < 0.001$ ; n.s. represents  $p > 0.05$ .

409 (G) Schematic of AAV encoding ESARE-mScarlet and CaMP0.4-paCaMKII transfected  
410 into neurons for biochemical assays.

411 (H) Dissociated hippocampal neurons expressing paCaMKII were illuminated with blue  
412 light for 5 min after the treatment with bicuculline (lane 1: no bicuculline/no light; lane 2:  
413 no bicuculline/with light; lane 3: bicuculline/no light; lane 4: bicuculline/with light). The  
414 kinase activity of paCaMKII and the expression of paCaMKII, actin proteins, and  
415 mScarlet were evaluated by western blotting.

416  
417

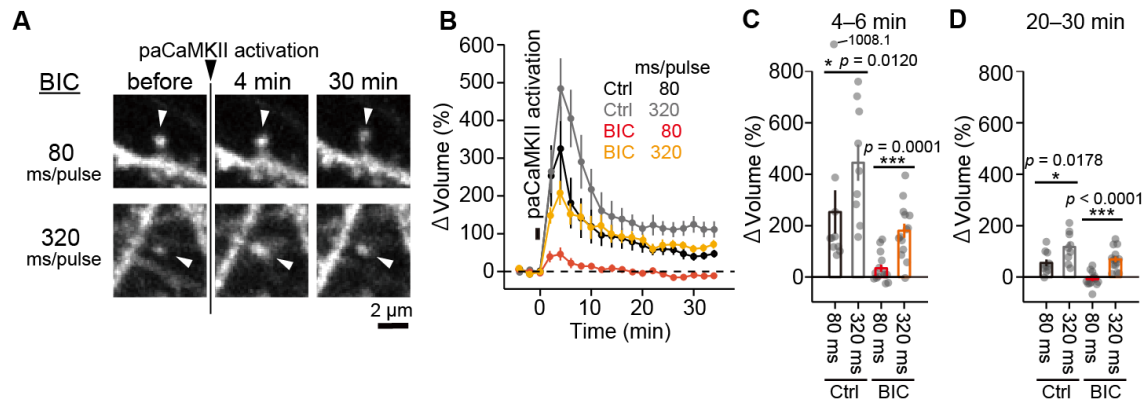

418

419 **Fig. 6. The activity of CaMKII pathway is not saturated in chronically excited**

420 **neurons**

421 (A) Two-photon fluorescence images of dendritic spines during the induction of sLTP by  
 422 two-photon paCaMKII activation after the bicuculline treatment. A hippocampal CA1  
 423 neuron expressing Achilles or d2Achilles and tdTomato-P2A-paCaMKII was observed by  
 424 two-photon excitation at 1010 nm, and paCaMKII was activated at 820 nm (30 trains, 0.5  
 425 Hz, 80 ms or 320 ms duration/pulse, 4 mW) in a spine indicated by white arrows.

426 (B) Averaged time course of the change in spine volume after paCaMKII activation with  
 427 different pulse durations (80 or 320 ms/pulse) are plotted for both the control (Ctrl) and  
 428 bicuculline-treated neurons (BIC). The number of samples (spines/neurons) was 10/5 for  
 429 Ctrl with 80 ms/pulse, 9/3 for Ctrl with 320 ms/pulse, 14/5 for BIC with 80 ms/pulse, and  
 430 14/5 for BIC with 320 ms/pulse.

431 (C and D) Quantification of the transient (C, averaged over 4–6 min) and sustained (D,  
 432 averaged over 20–30 min) change in spine volume. The data are presented as mean  $\pm$   
 433 standard error of the mean. Statistical comparisons were performed using one-way  
 434 analysis of variance followed by Tukey's test. \*\*\* $p < 0.001$ ; \* $p < 0.05$ ;

435

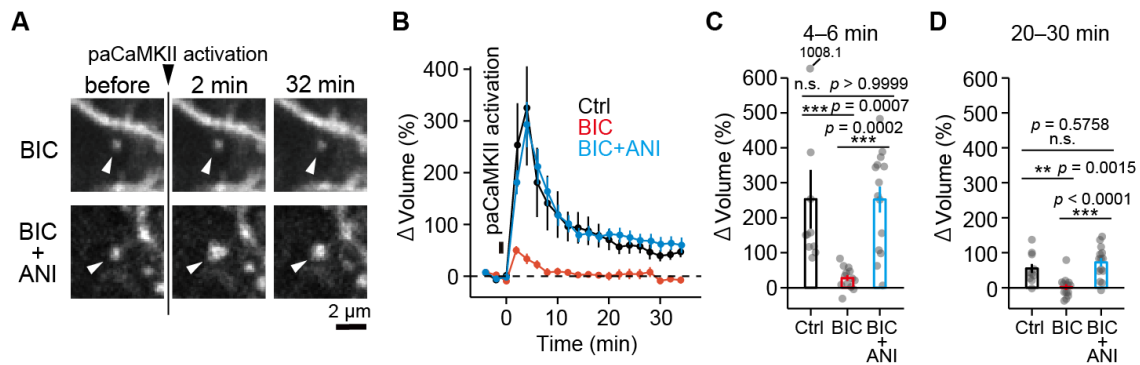

436

437 **Fig. 7. The suppression of paCaMKII-induced sLTP is dependent on protein**

438 **synthesis**

439 (A) Two-photon fluorescence images of dendritic spines during the induction of sLTP by  
440 two-photon paCaMKII activation. A hippocampal CA1 neuron expressing Achilles and  
441 tdTomato-P2A-paCaMKII was observed by two-photon excitation at 1010 nm, and  
442 paCaMKII was activated at 820 nm (30 trains, 0.5 Hz, 80 ms duration/pulse, 4 mW) in a  
443 spine indicated by white arrows.

444 (B) Averaged time course of the change in spine volume after paCaMKII activation after  
445 the bicuculline (BIC) or anisomycin (ANI) with bicuculline (BIC+ANI) treatment. For  
446 comparison, the averaged timecourse of control experiments (no bicuculline/anisomycin  
447 treatment) is also replotted (Ctrl). The number of samples (spines/neurons) was 10/5 for  
448 Ctrl, 13/4 for BIC, and 14/5 for BIC+ANI.

449 (C and D) Quantification of the transient (C, averaged over 4–6 min) and sustained (D,  
450 averaged over 20–30 min) change in spine volume. The data are presented as mean  $\pm$   
451 standard error of the mean. Statistical comparisons were performed using one-way  
452 analysis of variance followed by Tukey's test. \*\*\* $p < 0.001$ ; \*\* $p < 0.01$ ; n.s. represents  $p$   
453  $> 0.05$ .

454

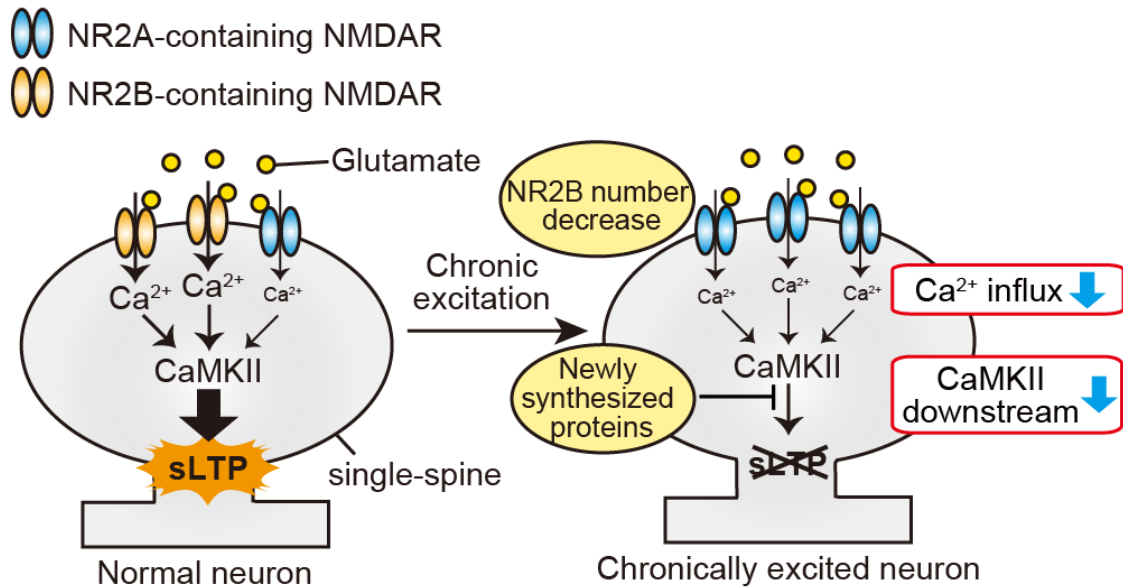

455

456 **Fig. 8. Schematic model of homeostatic suppression of sLTP**

457 Glutamate binds to NMDARs, leading to  $Ca^{2+}$  influx into a single spine.  $Ca^{2+}$  activates

458 CaMKII signaling, resulting in sLTP induction. Contrastingly,  $Ca^{2+}$  influx and CaMKII

459 downstream signaling are depressed in chronically activated neurons. The suppression of

460  $Ca^{2+}$  influx is due to the protein synthesis-independent downregulation of NMDARs. The

461 inhibition of CaMKII downstream signaling is protein synthesis-dependent. These two

462 independent inhibitory mechanisms may contribute to the robust homeostatic suppression

463 of sLTP.

464

## 465 **METHODS**

### 466 **Animals**

467 All the animal procedures were approved by the National Institute of Natural Sciences  
468 Animal Care and Use Committee, and were performed in accordance with the relevant  
469 guidelines and regulations. All the slice cultures were prepared using C57BL/6N mice  
470 (SLC, Shizuoka, Japan). This study used dissociated and slice cultures from both male and  
471 female pups.

472

### 473 **Reagents**

474 Bicuculline was purchased from Wako Pure Chemical Industries (Osaka, Japan). SR95531  
475 (gabazine) and 4-methoxy-7-nitroindolyl-caged-L-glutamate (MNI-caged glutamate)  
476 were purchased from Tocris Bioscience (Bristol, UK). Anisomycin was purchased from  
477 Sigma-Aldrich (St. Louis, MO, USA).

478

### 479 **Plasmids**

480 Plasmids containing *CaMKII $\alpha$* , *ESARE/d2Venus*, and *CaMKII0.4* promoter genes were  
481 gifts from Y. Hayashi, H. Bito, and M. Ehlers, respectively. Plasmids containing *WPRE3*,  
482 *Cre*, *GCaMP6f*, and hSyn-DIO-EGFP genes were gifts from Bong-Kiun Kaang, Connie  
483 Cepko, D. Kim, and Bryan Roth (Addgene plasmid #61463, #13775, #40755, #50457),  
484 respectively. The synthesized gene encoding *the d2Achilles* gene was purchased from  
485 FASMAC (Atsugi, Japan). pAAV-RC-DJ (AAV2/DJ) and pAAV-MCS/pAAV-Helper  
486 were purchased from Cell Biolabs (San Diego, CA, USA) and Agilent Technologies  
487 (Santa Clara, CA, USA), respectively.

488 The plasmids, namely ESARE-d2Achilles-SV40polyA, ESARE-d2Venus-  
489 SV40polyA, Syn-Cre-WPRE, CaMP04-tdTomato-P2A-paCaMKII $\alpha$ -WPRE3, and  
490 CaMP0.4-DIO-Achilles-WPRE3 were constructed by inserting the respective components  
491 into the pAAV-MCS. The CMV-GCaMP6f-P2A-mScarlet plasmid was constructed by  
492 inserting GcaMP6f (Chen et al., 2013) and mScarlet (Bindels et al., 2017), together with  
493 the P2A (Donnelly et al., 2001) sequence ATNFSLLKQAGDVEENPGP into the modified  
494 pEGFP-C1 vector by replacing EGFP (Clontech).

495

## 496 **AAV production and purification**

497 The preparation of AAVs has been described previously in detail (Lock et al., 2010;  
498 Shibata et al., 2021). Briefly, HEK293 cells were transfected with the plasmids in a 1:1.6:1  
499 ratio (45 µg of a transgene in pAAV, 72 µg of pAAV-Helper, and 45 µg of pAAV-RC-DJ  
500 [AAV2/DJ]) using the polyethylenimine method (Lock et al., 2010). Subsequently, the  
501 dishes were incubated at 37 °C and 5% CO<sub>2</sub> for 96 hrs. The collected culture medium was  
502 centrifuged and filtered to remove the cell debris. The clarified supernatant containing the  
503 AAV was concentrated using a cross-flow cassette (Vivaflow 50, 100,000MWCO,  
504 Sartorius; Goettingen, Germany) or Amicon Ultra-15 (100,000MWCO, Merck,  
505 Kenilworth, NJ, USA). Iodixanol step gradients were performed as described by Addgene  
506 (homepage section: AAV purification by iodixanol gradient ultracentrifugation). The  
507 buffer solution of the virus was exchanged with phosphate-buffered saline at different  
508 concentrations. The titer of AAVs was determined by quantitative polymerase chain  
509 reaction using the THUNDERBIRD qPCR Mix (Toyobo, Osaka, Japan). The resultant  
510 virus titers typically ranged between  $2 \times 10^9$  and  $2 \times 10^{10}$  genome copies/µL in a total  
511 volume of ~400 µL.

512

## 513 **Organotypic hippocampal slices and gene transfection by AAV or gene gun**

514 Hippocampal slices were prepared from postnatal day 6–9 C57BL/6N mice as described  
515 previously (Stoppini et al., 1991). Briefly, the animal was deeply anesthetized with  
516 isoflurane, after which the animal was quickly decapitated and the brain removed. The  
517 hippocampi were isolated and cut into 350 µm sections in an ice-cold dissection medium  
518 (250 mM N-2-hydroxyethylpiperazine-N'-2-ethanesulfonic acid, 2 mM NaHCO<sub>3</sub>, 4 mM  
519 KCl, 5 mM MgCl<sub>2</sub>, 1 mM CaCl<sub>2</sub>, 10 mM D-glucose, and 248 mM sucrose). The slices  
520 were cultured on the membrane inserts (PICMORG50; Millipore, Darmstadt, Germany),  
521 placed on the culture medium (50% minimal essential medium [MEM], 21% Hank's  
522 balanced salt solution, 15 mM NaHCO<sub>3</sub>, 6.25 mM N-2-hydroxyethylpiperazine-N'-2-  
523 ethanesulfonic acid, 10 mM D-glucose, 1 mM L-glutamine, 0.88 mM ascorbic acid, 1  
524 mg/mL insulin, and 25% horse serum), and incubated at 35° °C in 5% CO<sub>2</sub>.

525 For the imaging of spine morphology and sLTP, the cultured neurons were  
526 transfected by an injection of AAVs using a glass pipette (Narishige, Tokyo, Japan) after  
527 2–6 days in the slice culture. For Ca<sup>2+</sup> imaging, other cultured neurons were transfected  
528 with a gene gun (Scientz Biotechnology, Ningbo, China) using 1.6 µm gold particles

529 coated with plasmids after 8–9 days in slice culture. To make the bullets for the gene gun,  
530 gold particles (6 mg) and DNA (12 µg) were used in a 30 cm long tube.

531

### 532 **The induction of homeostatic plasticity by pharmacological neuronal excitation**

533 GABA<sub>A</sub> receptor antagonists (10 µM bicuculline or 1–3 µM gabazine) were added to the  
534 culture medium after 11–13 days *in vitro* (DIV). The time of application was then set to 0  
535 h for the experiments. The cultured hippocampal slices were incubated in this culture  
536 medium for 24 hrs at 35° C in 5% CO<sub>2</sub>. Subsequently, the slices were placed in an imaging  
537 buffer solution, and the experiment was carried out for up to 3 hrs.

538

### 539 **Imaging and analysis of spine morphology**

540 Dendritic spine imaging of hippocampal slice cultures was performed using a custom two-  
541 photon microscope. A Ti: sapphire laser (Spectra-Physics, Santa Clara, CA, USA) tuned to  
542 920 nm was used to excite the Achilles or d2Achilles proteins. The fluorescence signals of  
543 these proteins were collected with a ×60, NA1.0 objective lens (Olympus, Tokyo, Japan)  
544 and detected by a photomultiplier tube (H7422-40p; Hamamatsu, Hamamatsu, Japan)  
545 through an emission filter (FF01-510/84; Chroma). Signal acquisition and image (128×128  
546 pixels) construction were carried out using a data acquisition board (PCI-6110; National  
547 Instruments, Austin, TX, USA) and ScanImage software (Pologruto et al., 2003).

548 To measure the spine density, three secondary dendrites (50 µm in length from the  
549 primary dendrite) were selected and analyzed for each neuron. The spine density was  
550 calculated by dividing the spine number by the length of the dendrite. The images were  
551 analyzed using ImageJ software (National Institute of Health, Bethesda, MD, USA).

552

### 553 **Two-photon glutamate uncaging**

554 To induce sLTP in single spines, bath-applied 2 mM MNI-caged glutamate was uncaged  
555 by a second Ti: sapphire laser at a wavelength of 720 nm (30 trains, 0.5 Hz, 6 ms  
556 duration/pulse, 6 mW, measured under an objective lens) near the spine of interest. Since  
557 the focal plane of the imaging (920 nm) and activation (720 nm) lasers were different  
558 (~0.7 µm) due to chromatic aberration in the microscope, they were compensated by  
559 moving the sample stage along the z-axis (0.3 µm) with piezo stages (PKVL64F-100U;  
560 NCS6101C; Kohzu, Kawasaki, Japan) during the stimulation. Two-photon glutamate  
561 uncaging was carried out in the imaging buffer solution (136 mM NaCl, 5 mM KCl, 0.8



562 mM KH<sub>2</sub>PO<sub>4</sub>, 20 mM NaHCO<sub>3</sub>, 1.3 mM L-glutamine, 0.2 mM ascorbic acid, MEM amino  
563 acids solution [Gibco; Thermo Fisher, Waltham, MA, USA], MEM vitamin solution  
564 [Gibco; Thermo Fisher, Waltham, MA, USA], and 1.5 mg/ml phenol red) containing 4  
565 mM CaCl<sub>2</sub>, 0 mM MgCl<sub>2</sub>, 1 μM tetrodotoxin, and 2 mM MNI-caged glutamate aerated  
566 with 95% O<sub>2</sub>/5% CO<sub>2</sub> at 24–26°C.

567

### 568 **Ca<sup>2+</sup> imaging in single spines**

569 To measure the Ca<sup>2+</sup> transients, a Ti: sapphire laser tuned to a wavelength of 1000 nm was  
570 used for the excitation of both GCaMP6f and mScarlet. For image acquisition, 128×32  
571 pixels were acquired at 15.6 Hz. To apply the glutamate stimulation at single spines, bath-  
572 applied 2 mM MNI-caged glutamate was uncaged by a second Ti: sapphire laser at a  
573 wavelength of 720 nm (1 train, 6 ms duration/pulse, 6 mW, measured under an objective  
574 lens) near the spine of interest. Since the focal plane of the imaging (1000 nm) and  
575 activation (720 nm) lasers were different (0.5–1.0 μm), it was compensated by moving the  
576 sample stage along the z-axis (0.8 μm) with piezo stages during the stimulation. Two-  
577 photon glutamate uncaging was carried out in the imaging buffer solution containing 4  
578 mM CaCl<sub>2</sub>, 0 mM MgCl<sub>2</sub>, 1 μM tetrodotoxin, and 2 mM MNI-caged glutamate aerated  
579 with 95% O<sub>2</sub>/5% CO<sub>2</sub> at 24–26°C.

580

### 581 **Two-photon paCaMKII activation**

582 To activate paCaMKII in single spines with two-photon excitation, a second Ti: sapphire  
583 laser tuned to a wavelength of 820 nm was used with 30 trains (0.5 Hz, 80 ms  
584 duration/pulse, 4 mW) in the spine of interest. Since the focal plane of the imaging (1010  
585 nm) and activation (820 nm) lasers were different (0.5–1.0 μm), it was compensated by  
586 moving the sample stage in the z-axis (0.75 μm) with piezo stages during the stimulation.  
587 Two-photon paCaMKII activation was carried out in the imaging buffer solution  
588 containing 2 mM CaCl<sub>2</sub> and 2 mM MgCl<sub>2</sub> aerated with 95% O<sub>2</sub>/5% CO<sub>2</sub> at 24–26°C.

589

### 590 **Primary neuronal culture and AAV infection**

591 Low-density cultures of dissociated embryonic mouse hippocampal neurons were  
592 prepared as described previously (Murakoshi et al., 2017). Briefly, hippocampi were  
593 removed from C57BL/6N mice at embryonic day 18 and treated with papain for 10 min at

594 37°C, followed by gentle trituration. Hippocampal neurons were seeded onto  
595 polyethylenimine-coated 3-cm dishes ( $2 \times 10^5$  cells/dish) and cultured in neurobasal  
596 medium (Gibco; Thermo Fisher, Waltham, MA, USA) supplemented with B-27 and 2 mM  
597 Glutamax (Gibco; Thermo Fisher, Waltham, MA, USA). Primary neuronal cultures were  
598 infected with AAV-ESARE-mScarlet-Flag particles at a titer of  $4.35 \times 10^6$  genome  
599 copies/mL and AAV-CaMK0.4-FHS-paCaMKII-WPRE3 at a titer of  $4.72 \times 10^6$  genome  
600 copies/ml at DIV 9. After ~65 hrs, we applied 10  $\mu$ M bicuculline to the cultured neurons  
601 for 24 hrs, followed by a biochemical assay.

602

### 603 **Biochemical assay of autophosphorylation**

604 For the paCaMKII autophosphorylation assay in the cultured hippocampal neurons, the  
605 neurobasal medium was replaced with the medium containing no bicuculline and  
606 incubated for 1 hour in a CO<sub>2</sub> incubator in accordance with the condition of the sLTP  
607 experiment. To induce paCaMKII autophosphorylation, the samples were continuously  
608 illuminated with a light-emitting diode (M455L2-C1; Thorlabs, Newton, NJ, USA) at 3.82  
609 mW cm<sup>-2</sup> for 5 min. The reactions were stopped at the indicated times by adding a lysis  
610 solution (50 mM Tris pH 7.5, 1% NP-40, 5% glycerol, 150 mM NaCl, and 4 mM  
611 ethylenediaminetetraacetic acid). The samples were collected and centrifuged, and the  
612 supernatant was dissolved in sodium dodecyl sulfate sample buffer and analyzed by  
613 western blotting.

614 Western blotting was performed with the following antibodies: anti-phospho-  
615 CaMKII (Thr286) (D21E4; Cell Signaling Technology, MA, USA), anti-CaMKII $\alpha$  (6G9;  
616 Cell Signaling Technology, MA, USA), anti- $\beta$ -Actin (8H10D10; Cell Signaling  
617 Technology, MA, USA), anti-RFP for mScarlet detection (M204-3, MBL; Nagoya,  
618 Japan), and horseradish peroxidase-anti-mouse and -rabbit antibodies (Jackson  
619 Laboratory, Bar Harbor, ME, USA).

620

### 621 **Quantification and statistical analysis**

622 Statistical analyses were performed using MATLAB (Math Works, MA, USA) or  
623 GraphPad Prism (GraphPad, San Diego, CA, USA) software. The types of statistical tests,  
624 number of samples, and thresholds for statistical significance are described in the legends.

625

626 **Resource availability**

627 Further information and requests for resources and reagents should be directed to and will

628 be fulfilled by H.M. (murakosh@nips.ac.jp).

629

630 **REFERENCES**

- 631 Abegg, M.H., Savic, N., Ehrenguber, M.U., McKinney, R.A., and Gahwiler, B.H.  
632 (2004). Epileptiform activity in rat hippocampus strengthens excitatory synapses. *J*  
633 *Physiol* 554, 439-448.
- 634 Bayer, K.U., and Schulman, H. (2019). CaM Kinase: Still Inspiring at 40. *Neuron*  
635 103, 380-394.
- 636 Bindels, D.S., Haarbosch, L., van Weeren, L., Postma, M., Wiese, K.E., Mastop, M.,  
637 Aumonier, S., Gotthard, G., Royant, A., Hink, M.A., *et al.* (2017). mScarlet: a bright  
638 monomeric red fluorescent protein for cellular imaging. *Nat Methods* 14, 53-56.
- 639 Bosch, M., Castro, J., Saneyoshi, T., Matsuno, H., Sur, M., and Hayashi, Y. (2014).  
640 Structural and molecular remodeling of dendritic spine substructures during long-term  
641 potentiation. *Neuron* 82, 444-459.
- 642 Chen, T.W., Wardill, T.J., Sun, Y., Pulver, S.R., Renninger, S.L., Baohan, A.,  
643 Schreiter, E.R., Kerr, R.A., Orger, M.B., Jayaraman, V., *et al.* (2013). Ultrasensitive  
644 fluorescent proteins for imaging neuronal activity. *Nature* 499, 295-300.
- 645 Chen, Y., Wang, Y., Erturk, A., Kallop, D., Jiang, Z., Weimer, R.M., Kaminker, J.,  
646 and Sheng, M. (2014). Activity-induced Nr4a1 regulates spine density and distribution  
647 pattern of excitatory synapses in pyramidal neurons. *Neuron* 83, 431-443.
- 648 Cingolani, L.A., and Goda, Y. (2008). Actin in action: the interplay between the  
649 actin cytoskeleton and synaptic efficacy. *Nat Rev Neurosci* 9, 344-356.
- 650 Cooper, L.N., and Bear, M.F. (2012). The BCM theory of synapse modification at  
651 30: interaction of theory with experiment. *Nat Rev Neurosci* 13, 798-810.
- 652 Derkach, V.A., Oh, M.C., Guire, E.S., and Soderling, T.R. (2007). Regulatory  
653 mechanisms of AMPA receptors in synaptic plasticity. *Nat Rev Neurosci* 8, 101-113.
- 654 Donnelly, M.L., Luke, G., Mehrotra, A., Li, X., Hughes, L.E., Gani, D., and Ryan,  
655 M.D. (2001). Analysis of the aphthovirus 2A/2B polyprotein 'cleavage' mechanism  
656 indicates not a proteolytic reaction, but a novel translational effect: a putative ribosomal  
657 'skip'. *J Gen Virol* 82, 1013-1025.
- 658 Dorrbaum, A.R., Alvarez-Castelao, B., Nassim-Assir, B., Langer, J.D., and  
659 Schuman, E.M. (2020). Proteome dynamics during homeostatic scaling in cultured  
660 neurons. *Elife* 9.
- 661 Ehlers, M.D. (2003). Activity level controls postsynaptic composition and signaling  
662 via the ubiquitin-proteasome system. *Nat Neurosci* 6, 231-242.
- 663 Fiore, R., Rajman, M., Schwale, C., Bicker, S., Antoniou, A., Bruehl, C., Draguhn,  
664 A., and Schratt, G. (2014). MiR-134-dependent regulation of Pumilio-2 is necessary for  
665 homeostatic synaptic depression. *EMBO J* 33, 2231-2246.
- 666 Giese, K.P., and Mizuno, K. (2013). The roles of protein kinases in learning and  
667 memory. *Learn Mem* 20, 540-552.
- 668 Goold, C.P., and Nicoll, R.A. (2010). Single-cell optogenetic excitation drives  
669 homeostatic synaptic depression. *Neuron* 68, 512-528.

- 670 Govindarajan, A., Israely, I., Huang, S.Y., and Tonegawa, S. (2011). The dendritic  
671 branch is the preferred integrative unit for protein synthesis-dependent LTP. *Neuron* 69,  
672 132-146.
- 673 Harvey, C.D., and Svoboda, K. (2007). Locally dynamic synaptic learning rules in  
674 pyramidal neuron dendrites. *Nature* 450, 1195-1200.
- 675 Herring, B.E., and Nicoll, R.A. (2016). Long-Term Potentiation: From CaMKII to  
676 AMPA Receptor Trafficking. *Annu Rev Physiol* 78, 351-365.
- 677 Hu, J.H., Park, J.M., Park, S., Xiao, B., Dehoff, M.H., Kim, S., Hayashi, T.,  
678 Schwarz, M.K., Huganir, R.L., Seeburg, P.H., *et al.* (2010). Homeostatic scaling requires  
679 group I mGluR activation mediated by Homer1a. *Neuron* 68, 1128-1142.
- 680 Jourdain, P., Fukunaga, K., and Muller, D. (2003). Calcium/calmodulin-dependent  
681 protein kinase II contributes to activity-dependent filopodia growth and spine formation. *J*  
682 *Neurosci* 23, 10645-10649.
- 683 Kawashima, T., Kitamura, K., Suzuki, K., Nonaka, M., Kamijo, S., Takemoto-  
684 Kimura, S., Kano, M., Okuno, H., Ohki, K., and Bito, H. (2013). Functional labeling of  
685 neurons and their projections using the synthetic activity-dependent promoter E-SARE.  
686 *Nat Methods* 10, 889-895.
- 687 Keck, T., Hubener, M., and Bonhoeffer, T. (2017). Interactions between synaptic  
688 homeostatic mechanisms: an attempt to reconcile BCM theory, synaptic scaling, and  
689 changing excitation/inhibition balance. *Curr Opin Neurobiol* 43, 87-93.
- 690 Lee, K.J., Lee, Y., Rozeboom, A., Lee, J.Y., Udagawa, N., Hoe, H.S., and Pak, D.T.  
691 (2011). Requirement for Plk2 in orchestrated ras and rap signaling, homeostatic structural  
692 plasticity, and memory. *Neuron* 69, 957-973.
- 693 Lee, M.C., Yasuda, R., and Ehlers, M.D. (2010). Metaplasticity at single  
694 glutamatergic synapses. *Neuron* 66, 859-870.
- 695 Lee, S.J., Escobedo-Lozoya, Y., Szatmari, E.M., and Yasuda, R. (2009). Activation  
696 of CaMKII in single dendritic spines during long-term potentiation. *Nature* 458, 299-304.
- 697 Li, X., Zhao, X., Fang, Y., Jiang, X., Duong, T., Fan, C., Huang, C.C., and Kain,  
698 S.R. (1998). Generation of destabilized green fluorescent protein as a transcription  
699 reporter. *J Biol Chem* 273, 34970-34975.
- 700 Lisman, J., Yasuda, R., and Raghavachari, S. (2012). Mechanisms of CaMKII action  
701 in long-term potentiation. *Nat Rev Neurosci* 13, 169-182.
- 702 Lledo, P.M., Hjelmstad, G.O., Mukherji, S., Soderling, T.R., Malenka, R.C., and  
703 Nicoll, R.A. (1995). Calcium/calmodulin-dependent kinase II and long-term potentiation  
704 enhance synaptic transmission by the same mechanism. *Proc Natl Acad Sci U S A* 92,  
705 11175-11179.
- 706 Lock, M., Alvira, M., Vandenberghe, L.H., Samanta, A., Toelen, J., Debyser, Z., and  
707 Wilson, J.M. (2010). Rapid, simple, and versatile manufacturing of recombinant adeno-  
708 associated viral vectors at scale. *Hum Gene Ther* 21, 1259-1271.
- 709 Malinow, R., and Malenka, R.C. (2002). AMPA receptor trafficking and synaptic  
710 plasticity. *Annu Rev Neurosci* 25, 103-126.

- 711 Matsuzaki, M., Honkura, N., Ellis-Davies, G.C., and Kasai, H. (2004). Structural  
712 basis of long-term potentiation in single dendritic spines. *Nature* 429, 761-766.
- 713 Mendez, P., Stefanelli, T., Flores, C.E., Muller, D., and Luscher, C. (2018).  
714 Homeostatic Plasticity in the Hippocampus Facilitates Memory Extinction. *Cell Rep* 22,  
715 1451-1461.
- 716 Moulin, T.C., Petiz, L.L., Rayee, D., Winne, J., Maia, R.G., Lima da Cruz, R.V.,  
717 Amaral, O.B., and Leao, R.N. (2019). Chronic in vivo optogenetic stimulation modulates  
718 neuronal excitability, spine morphology, and Hebbian plasticity in the mouse  
719 hippocampus. *Hippocampus* 29, 755-761.
- 720 Murakoshi, H., Shin, M.E., Parra-Bueno, P., Szatmari, E.M., Shibata, A.C., and  
721 Yasuda, R. (2017). Kinetics of Endogenous CaMKII Required for Synaptic Plasticity  
722 Revealed by Optogenetic Kinase Inhibitor. *Neuron* 94, 37-47 e35.
- 723 Murakoshi, H., and Yasuda, R. (2012). Postsynaptic signaling during plasticity of  
724 dendritic spines. *Trends Neurosci* 35, 135-143.
- 725 Nakahata, Y., and Yasuda, R. (2018). Plasticity of Spine Structure: Local Signaling,  
726 Translation and Cytoskeletal Reorganization. *Front Synaptic Neurosci* 10, 29.
- 727 Nicoll, R.A. (2017). A Brief History of Long-Term Potentiation. *Neuron* 93, 281-  
728 290.
- 729 Perez-Otano, I., and Ehlers, M.D. (2005). Homeostatic plasticity and NMDA  
730 receptor trafficking. *Trends Neurosci* 28, 229-238.
- 731 Pettit, D.L., Perlman, S., and Malinow, R. (1994). Potentiated transmission and  
732 prevention of further LTP by increased CaMKII activity in postsynaptic hippocampal slice  
733 neurons. *Science* 266, 1881-1885.
- 734 Pologruto, T.A., Sabatini, B.L., and Svoboda, K. (2003). ScanImage: flexible  
735 software for operating laser scanning microscopes. *Biomed Eng Online* 2, 13.
- 736 Sala, C., Futai, K., Yamamoto, K., Worley, P.F., Hayashi, Y., and Sheng, M. (2003).  
737 Inhibition of dendritic spine morphogenesis and synaptic transmission by activity-  
738 inducible protein Homer1a. *J Neurosci* 23, 6327-6337.
- 739 Saneyoshi, T., Matsuno, H., Suzuki, A., Murakoshi, H., Hedrick, N.G., Agnello, E.,  
740 O'Connell, R., Stratton, M.M., Yasuda, R., and Hayashi, Y. (2019). Reciprocal Activation  
741 within a Kinase-Effector Complex Underlying Persistence of Structural LTP. *Neuron* 102,  
742 1199-1210 e1196.
- 743 Schanzenbacher, C.T., Langer, J.D., and Schuman, E.M. (2018). Time- and polarity-  
744 dependent proteomic changes associated with homeostatic scaling at central synapses.  
745 *Elife* 7.
- 746 Schanzenbacher, C.T., Sambandan, S., Langer, J.D., and Schuman, E.M. (2016).  
747 Nascent Proteome Remodeling following Homeostatic Scaling at Hippocampal Synapses.  
748 *Neuron* 92, 358-371.
- 749 Seeburg, D.P., and Sheng, M. (2008). Activity-Induced Polo-Like Kinase 2 Is  
750 Required for Homeostatic Plasticity of Hippocampal Neurons during Epileptiform  
751 Activity. *The Journal of Neuroscience* 28, 6583-6591.

- 752 Shibata, A.C.E., Ueda, H.H., Eto, K., Onda, M., Sato, A., Ohba, T., Nabekura, J.,  
753 and Murakoshi, H. (2021). Photoactivatable CaMKII induces synaptic plasticity in single  
754 synapses. *Nat Commun* 12, 751.
- 755 Sobczyk, A., Scheuss, V., and Svoboda, K. (2005). NMDA receptor subunit-  
756 dependent [Ca<sup>2+</sup>] signaling in individual hippocampal dendritic spines. *J Neurosci* 25,  
757 6037-6046.
- 758 Stoppini, L., Buchs, P.A., and Muller, D. (1991). A simple method for organotypic  
759 cultures of nervous tissue. *J Neurosci Methods* 37, 173-182.
- 760 Suarez, L.M., Cid, E., Gal, B., Inostroza, M., Brotons-Mas, J.R., Gomez-  
761 Dominguez, D., de la Prida, L.M., and Solis, J.M. (2012). Systemic injection of kainic acid  
762 differently affects LTP magnitude depending on its epileptogenic efficiency. *PLoS One* 7,  
763 e48128.
- 764 van der Linden, J.A., Joels, M., Karst, H., Juta, A.J., and Wadman, W.J. (1993).  
765 Bicuculline increases the intracellular calcium response of CA1 hippocampal neurons to  
766 synaptic stimulation. *Neurosci Lett* 155, 230-233.
- 767 Watt, A.J., van Rossum, M.C., MacLeod, K.M., Nelson, S.B., and Turrigiano, G.G.  
768 (2000). Activity coregulates quantal AMPA and NMDA currents at neocortical synapses.  
769 *Neuron* 26, 659-670.
- 770 Yashiro, K., and Philpot, B.D. (2008). Regulation of NMDA receptor subunit  
771 expression and its implications for LTD, LTP, and metaplasticity. *Neuropharmacology* 55,  
772 1081-1094.
- 773 Yoshioka-Kobayashi, K., Matsumiya, M., Niino, Y., Isomura, A., Kori, H.,  
774 Miyawaki, A., and Kageyama, R. (2020). Coupling delay controls synchronized  
775 oscillation in the segmentation clock. *Nature* 580, 119-123.
- 776
